# Supplementary material
Source: bioRxiv or medRxiv preprint supplement (https://medrxiv.org/highwire/filestream/89803/field_highwire_adjunct_files/0/2020.07.13.20141036-1.pdf)
Supplement: Supplementary file [file 2020.07.13.20141036-1.pdf]

**Preclinical and first-in-human-brain-cancer applications of  
[<sup>18</sup>F]poly-(ADP-ribose) polymerase inhibitor PET/MR**

**AUTHORS:** Robert J Young MD<sup>1,8\*</sup>†, Paula Demétrio De Souza França MD<sup>1,2</sup>†, Giacomo Pirovano DPhil<sup>1</sup>, Anna F Piotrowski MD<sup>3,8</sup>, Philip J Nicklin<sup>1</sup>, Christopher C Riedl MD PhD<sup>1</sup>, Jazmin Schwartz PhD<sup>4,10,11</sup>, Tejus A Bale MD PhD<sup>5,8</sup>, Patrick L Donabedian<sup>1</sup>, Susanne Kossatz<sup>1</sup>, Eva M Burnazi<sup>1</sup>, Sheryl Roberts PhD<sup>1</sup>, Serge K Lyashchenko PharmD<sup>1</sup>, Alexandra M Miller MD PhD<sup>3,8</sup>, Nelson S. Moss MD<sup>6,8</sup>, Megan Fiasconaro<sup>7</sup>, Zhigang Zhang PhD<sup>7</sup>, Audrey Mauguen PhD<sup>7</sup>, Thomas Reiner PhD<sup>1,9,10</sup>‡, Mark P Dunphy MD<sup>1\*</sup>‡

† RJY and PDSF contributed equally as co-first authors

‡ TR and MPD contributed equally as co-senior authors

**AFFILIATIONS:**

<sup>1</sup> Department of Radiology, Memorial Sloan Kettering Cancer Center, New York, New York

<sup>2</sup> Department of Otorhinolaryngology and Head and Neck Surgery, Federal University of São Paulo, SP, Brazil.

<sup>3</sup> Department of Neurology, Memorial Sloan Kettering Cancer Center, New York, New York

<sup>4</sup> Department of Medical Physics, Memorial Sloan Kettering Cancer Center, New York, New York

<sup>5</sup> Department of Pathology, Memorial Sloan Kettering Cancer Center, New York, New York

<sup>6</sup> Department of Neurosurgery and Brain Metastasis Center, Memorial Sloan Kettering Cancer Center, New York, New York

<sup>7</sup> Department of Biostatistics and Epidemiology, Memorial Sloan Kettering Cancer Center, New York, New York

<sup>8</sup> The Brain Tumor Center, Memorial Sloan Kettering Cancer Center, New York, New York

<sup>9</sup> Weill Cornell Medical College, New York, NY, USA

<sup>10</sup> Chemical Biology Program, Memorial Sloan Kettering Cancer Center, New York, NY, USA

<sup>11</sup> Department of Radiology, Weill Cornell Medical College, New York, NY, USA.

**\* Corresponding authors:**

Robert J Young, MD

Neuroradiology Service, Department of Radiology

Memorial Sloan Kettering Cancer Center

1275 York Avenue

New York, New York 10065

Mark P Dunphy, MD

Molecular and Imaging Therapy Services

Department of Radiology

Memorial Sloan Kettering Cancer Center

1275 York Avenue

New York, New York 10065

**SUPPLEMENTARY MATERIAL:**

**Supplementary Table 1. Lesion measurements**

| <b>Lesion Diagnosis</b> | <b>Volume (cm3)</b> | <b>SUV 60 mean</b> | <b>SUV 120 mean</b> | <b>Ratio SUV 60 mean</b> | <b>Ratio SUV 120 mean</b> | <b>DCE rKtrans</b> | <b>DCE rVP</b> | <b>Tumor ratio CCA</b> |
|-------------------------|---------------------|--------------------|---------------------|--------------------------|---------------------------|--------------------|----------------|------------------------|
| 1 Not Tumor             | 129.9               | 0.31               | 0.24                | 0.52                     | 0.63                      | 1.15               | 1.41           | 0.37                   |
| 2 Tumor                 | 38.4                | 1.23               | 0.84                | 2.02                     | 2.33                      | 5                  | 3.37           | 0.49                   |
| 3 Not Tumor             | 48.1                | 0.48               | 0.38                | 0.79                     | 1.06                      | 2.5                | 1.57           | 0.39                   |
| 4 Not Tumor             | 22.9                | 0.42               | 0.31                | 0.69                     | 0.86                      | 1.92               | 1.41           | 0.32                   |
| 5 Not Tumor             | 112.9               | 0.75               | 0.66                | 0.75                     | 1.05                      | 2.8                | 1.9            | 0.53                   |
| 6 Tumor                 | 73.8                | 1.11               | 0.8                 | 1.98                     | 1.86                      | 9.93               | 8.03           | 0.67                   |
| 7 Tumor                 | 57.9                | 1.16               | 0.71                | 1.78                     | 1.51                      | 7.2                | 4.28           | 0.79                   |

SUV60 = standardized uptake value 60 min after injection

SUV120 = standardized uptake value 120 min after injection

DCE = dynamic contrast enhanced T1 perfusion

rKtrans = ratio transfer coefficient constant lesion/normal (measure of leakiness)

VP = ratio plasma volume lesion/normal (measure of perfusion)

Tumor ratio = tumor / (tumor + necrosis)

CCA = contrast clearance analysis

**Supplementary table 2. PARP1 expression (IHC)**

| <b>Tissue</b>             | <b>Renal</b>              | <b>GBM</b>                | <b>Melanoma</b>           | <b>Not</b>                |                            |
|---------------------------|---------------------------|---------------------------|---------------------------|---------------------------|----------------------------|
| <b>Characteristic</b>     | <b>Carcinoma</b>          | <b>Lesion #7</b>          | <b>Lesion #2</b>          | <b>Cancer</b>             | <b>p-value<sup>2</sup></b> |
|                           | <b>Lesion #6</b>          |                           |                           | <b>Lesion #5</b>          |                            |
|                           | <b>n = 12<sup>1</sup></b> | <b>n = 18<sup>1</sup></b> | <b>n = 37<sup>1</sup></b> | <b>n = 25<sup>1</sup></b> |                            |
| PARP1 expression<br>(IHC) | 10 (7, 10)                | 14 (11, 16)               | 7 (3, 14)                 | 3 (1, 5)                  | <0.001                     |

<sup>1</sup>Statistics presented: median (IQR)

<sup>2</sup>Statistical tests performed: Kruskal-Wallis test

**Supplementary table 3. Data from the blocking experiment, showing that PARPi-FL specific uptake can be blocked by saturating the PARP1 enzyme with excess of PARP inhibitor.**

| <b>Characteristic*</b> | <b>Signal &lt; 3</b><br><b>n = 2251<sup>1</sup></b> | <b>Signal ≥ 3</b><br><b>n = 1453<sup>1</sup></b> | <b>p-value<sup>2</sup></b> |
|------------------------|-----------------------------------------------------|--------------------------------------------------|----------------------------|
| Blocking               |                                                     |                                                  | <0.001                     |
| <i>Blocked</i>         | 1136 (50%)                                          | 223 (15%)                                        |                            |
| <i>Unblocked</i>       | 1115 (50%)                                          | 1230 (85%)                                       |                            |

<sup>1</sup> Statistics presented: n (%)

<sup>2</sup> Statistical tests performed: chi-square test of independence

\*Dichotomization at  $\geq 3$  vs  $< 3$ , analyzed using chi-square test

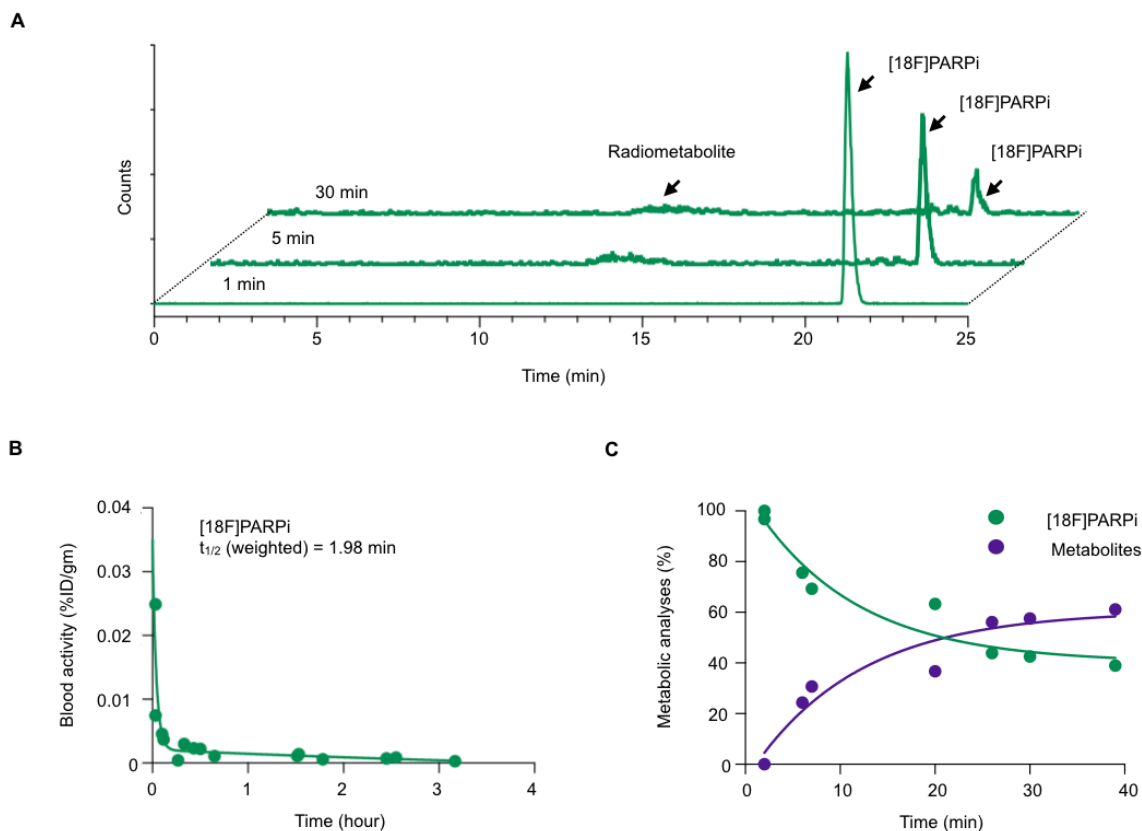

**Supplementary Fig. 1. Metabolic stability and blood half-life of [<sup>18</sup>F]PARPi in patients with brain cancer.** In total, blood samples from 3 patients were analyzed. (A) HPLC chromatogram of [<sup>18</sup>F]PARPi in human blood serum of a patient #2 at various time points post injection (1 min, 5 min and 30 min). (B) Weighted blood half-life of [<sup>18</sup>F]PARPi across all available patients (2-phase decay, no constraints, n = 3 patients). (C) Percentage of [<sup>18</sup>F]PARPi and its metabolites at various time points after injection (n = 3 patients).

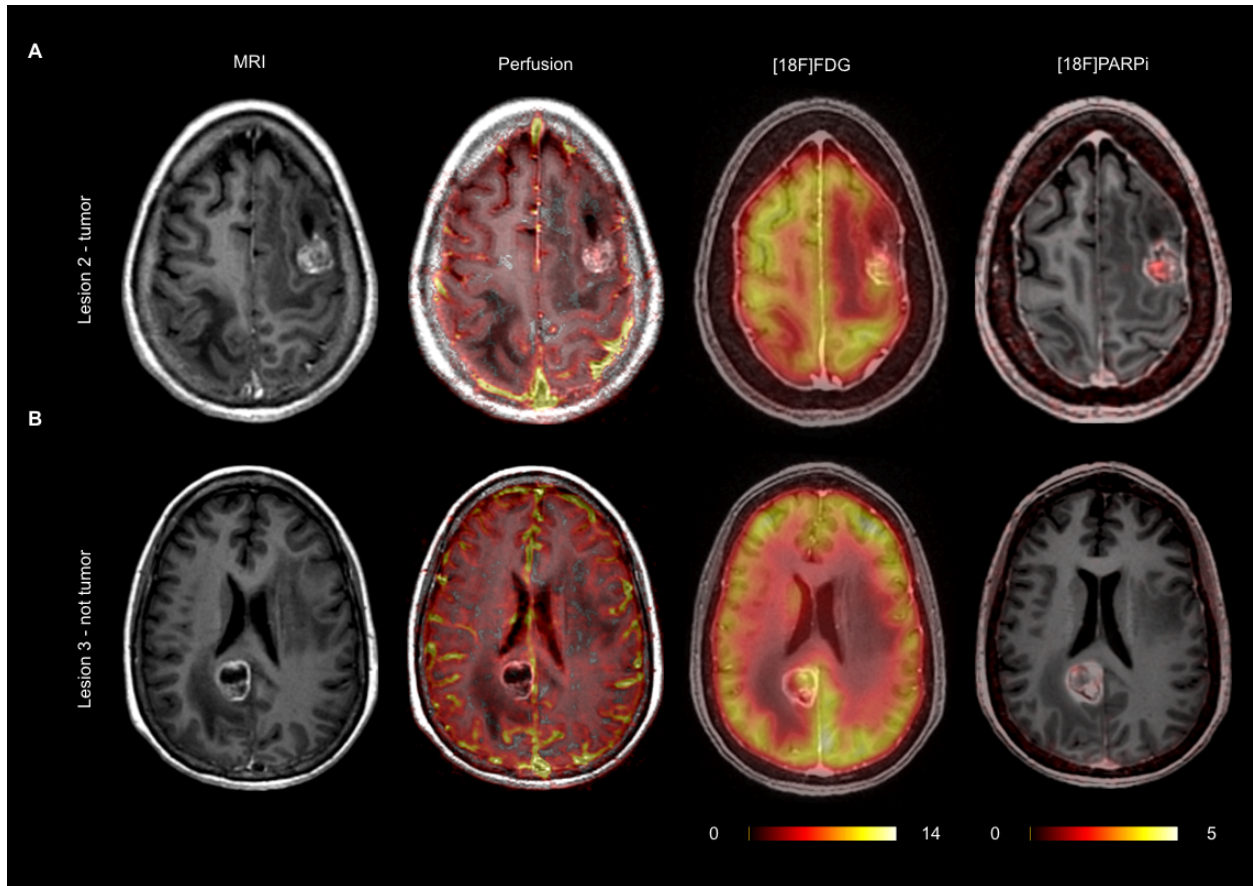

**Supplementary Fig. 2. Lesion 2 and lesion 3 on patient 2 scanned with  $[^{18}\text{F}]\text{PARPi}$  and  $[^{18}\text{F}]\text{FDG}$**  Patient number 2, harbored 3 metastatic melanoma lesions treated with stereotactic radiosurgery around 10 months prior to imaging. (A) Lesion 2, on the left frontal lobe. This lesion presented with minimal perfusion and it was not seen on  $[^{18}\text{F}]\text{FDG}$  scan. Imaging with  $[^{18}\text{F}]\text{PARPi}$  demonstrated clear uptake. This lesion was surgically resected and histologically proven to be a viable metastatic melanoma. (B) Lesion number 3, right parietal lobe. This lesion also presented with minimal perfusion and it was not seen on  $[^{18}\text{F}]\text{FDG}$  scan. However, imaging with  $[^{18}\text{F}]\text{PARPi}$  demonstrated no uptake. This lesion was not surgically resected but was followed with imaging. This lesion was classified as treatment-related changes: determined by clinical and imaging follow



up based on the Response Assessment in Neuro-Oncology (RANO) criteria for primary brain cancers and the RANO brain metastasis (RANO-BM) criteria for secondary brain cancers.
